# Supplementary material for: Nucleotide Modification Alters MicroRNA-Dependent Silencing of MicroRNA Switches
Source: PubMed Central journal article supplement — Mol Ther Nucleic Acids. 2018 Dec 18;14:339–50. doi: 10.1016/j.omtn.2018.12.007 (PMC6350232; doi:10.1016/j.omtn.2018.12.007), 2018-12-18
Supplement: mmc1.pdf [file mmc1.pdf]

**OMTN, Volume 14**

**Supplemental Information**

**Nucleotide Modification Alters  
MicroRNA-Dependent Silencing  
of MicroRNA Switches**

**John Lockhart, John Canfield, Ezinne Francesc Mong, Jeffrey VanWye, and Hana Totary-Jain**

**Supplementary Material**

**Nucleotide modification alters microRNA-dependent silencing of microRNA switches**

John Lockhart<sup>1</sup>, John Canfield<sup>1</sup>, Ezinne Frances Mong<sup>1</sup>, Jeffrey VanWye<sup>1</sup>, and Hana Totary-Jain<sup>1\*</sup>

<sup>1</sup> Department of Molecular Pharmacology and Physiology, Morsani College of Medicine, University of South Florida, Tampa, Florida, 33612, USA

Supplementary Figure S1

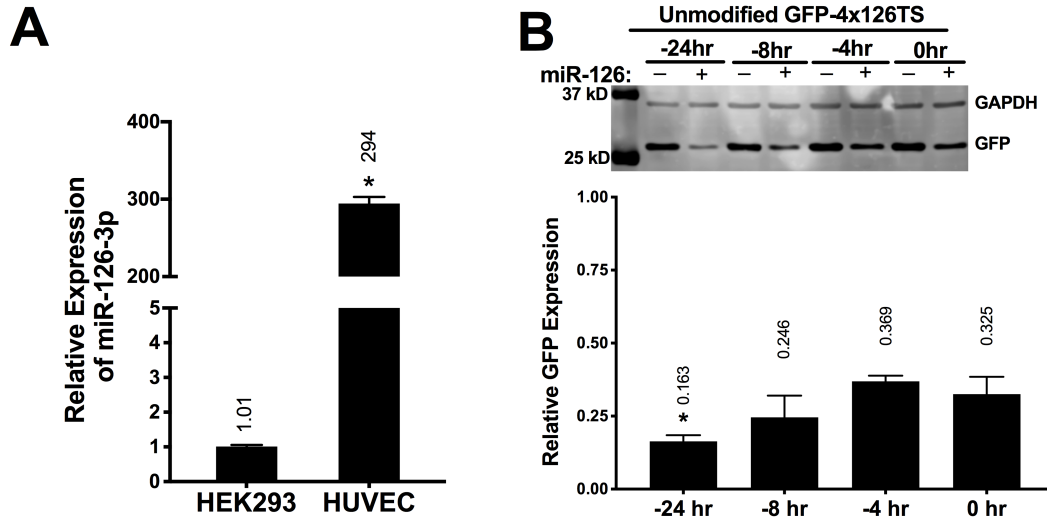

**Supplementary Figure S1: Expression of miR-126-3p and optimization of miRNA mimic delivery in HEK293 cells.** (A) Real-time PCR analysis of the indicated miRNA expression in HEK293 and HUVEC. (B) Representative immunoblot and densitometric quantification of HEK293 cells transfected with miR-126-3p mimics or vehicle control at the indicated time point before transfection with unmodified GFP-4x126TS miRNA switches. GFP and GAPDH expression were measured after 24 hours. Data represent the mean  $\pm$  SEM of three independent experiments, normalized against U18 (A) or GAPDH (B) and relative to HEK293 cells (A) or vehicle control (B). \* $p < 0.05$  versus HEK293 (A) or 0 hour time point (B). Numbers above bars indicate the mean values.

Supplementary Figure S2

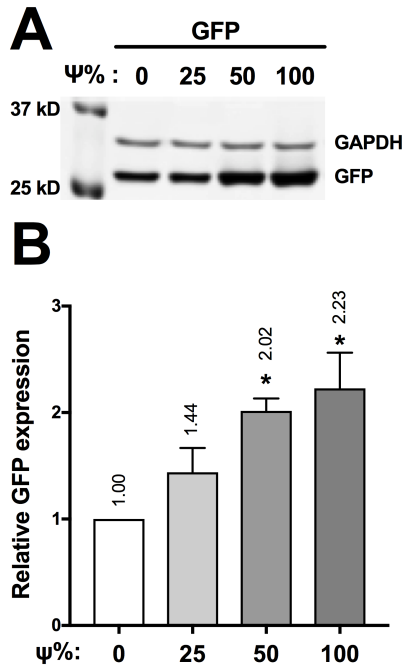

**Supplementary Figure S2:  $\Psi$ -substitution increases GFP expression from IVT mRNA.** Representative immunoblot and densitometric quantification of HEK293 cells transfected with with GFP-encoding IVT mRNA with the indicated percentage of  $\Psi$ -substitution. GFP and GAPDH expression were measured after 24 hours. Data represent the mean  $\pm$  SEM of three independent experiments, normalized against GAPDH and relative to unmodified GFP-encoding IVT mRNA. \* $p < 0.05$  versus unmodified GFP-encoding IVT mRNA. Numbers above bars indicate the mean values.

Supplementary Figure S3

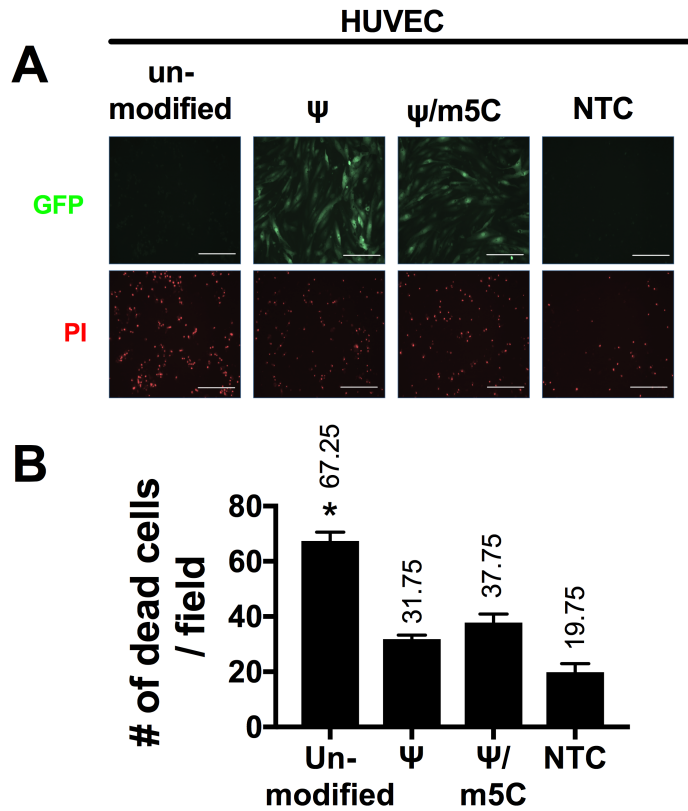

**Supplementary Figure S3: Nucleotide modification decreases cytotoxicity and increases GFP expression in HUVEC.** (A-B) Representative fluorescence microscopy images (A) and number of dead cells per field (B) of HUVEC 24 hours after transfection with GFP-encoding IVT mRNA with the indicated modified nucleotides (Scale bars: 200  $\mu$ m; 20x magnification). Media was changed four hours after mRNA transfection. Fluorescence Imaging and quantification of dead cells was performed by adding propidium iodide after 24 hours without removal of the media. Data represent the mean  $\pm$  SEM from four non-overlapping fields. Numbers above bars indicate the mean values.

Supplementary Figure S4

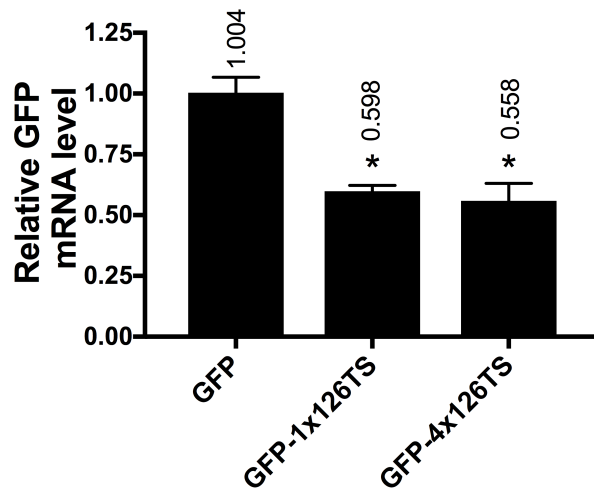

**Supplementary Figure S4: Additional miRNA target sites do not increase cleavage of miRNA switches.** Real Time-PCR analysis of GFP normalized to GAPDH mRNA from HUVEC transfected with the indicated 100%  $\Psi$ -modified GFP miRNA switch. Data represent the mean  $\pm$  SEM of one representative experiment performed in triplicate. \* $p < 0.05$  versus GFP mRNA transfected cells. Numbers above bars indicate the mean values.

Supplementary Figure S5

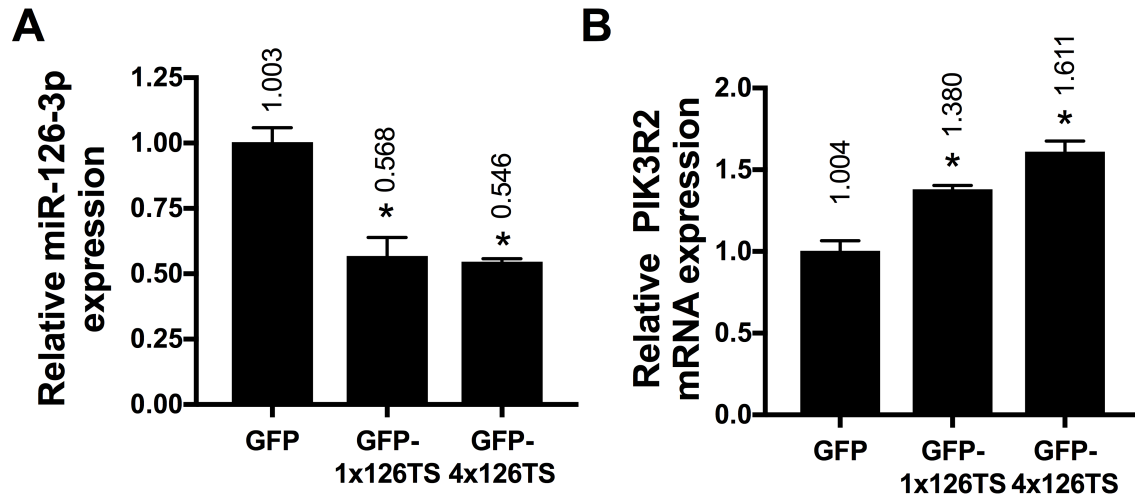

*Supplementary Figure S5: miRNA sponging by miRNA switches in HUVEC. (A-B) Real Time-PCR analysis of miR-126-3p normalized to U18 snRNA (A) and PIK3R2 normalized to GAPDH mRNA (B) from HUVEC transfected with the indicated 100%  $\Psi$ -modified GFP miRNA switch. Data represent the mean  $\pm$  SEM of one representative experiment performed in triplicate. \* $p < 0.05$  versus GFP mRNA transfected cells. Numbers above bars indicate the mean values.*

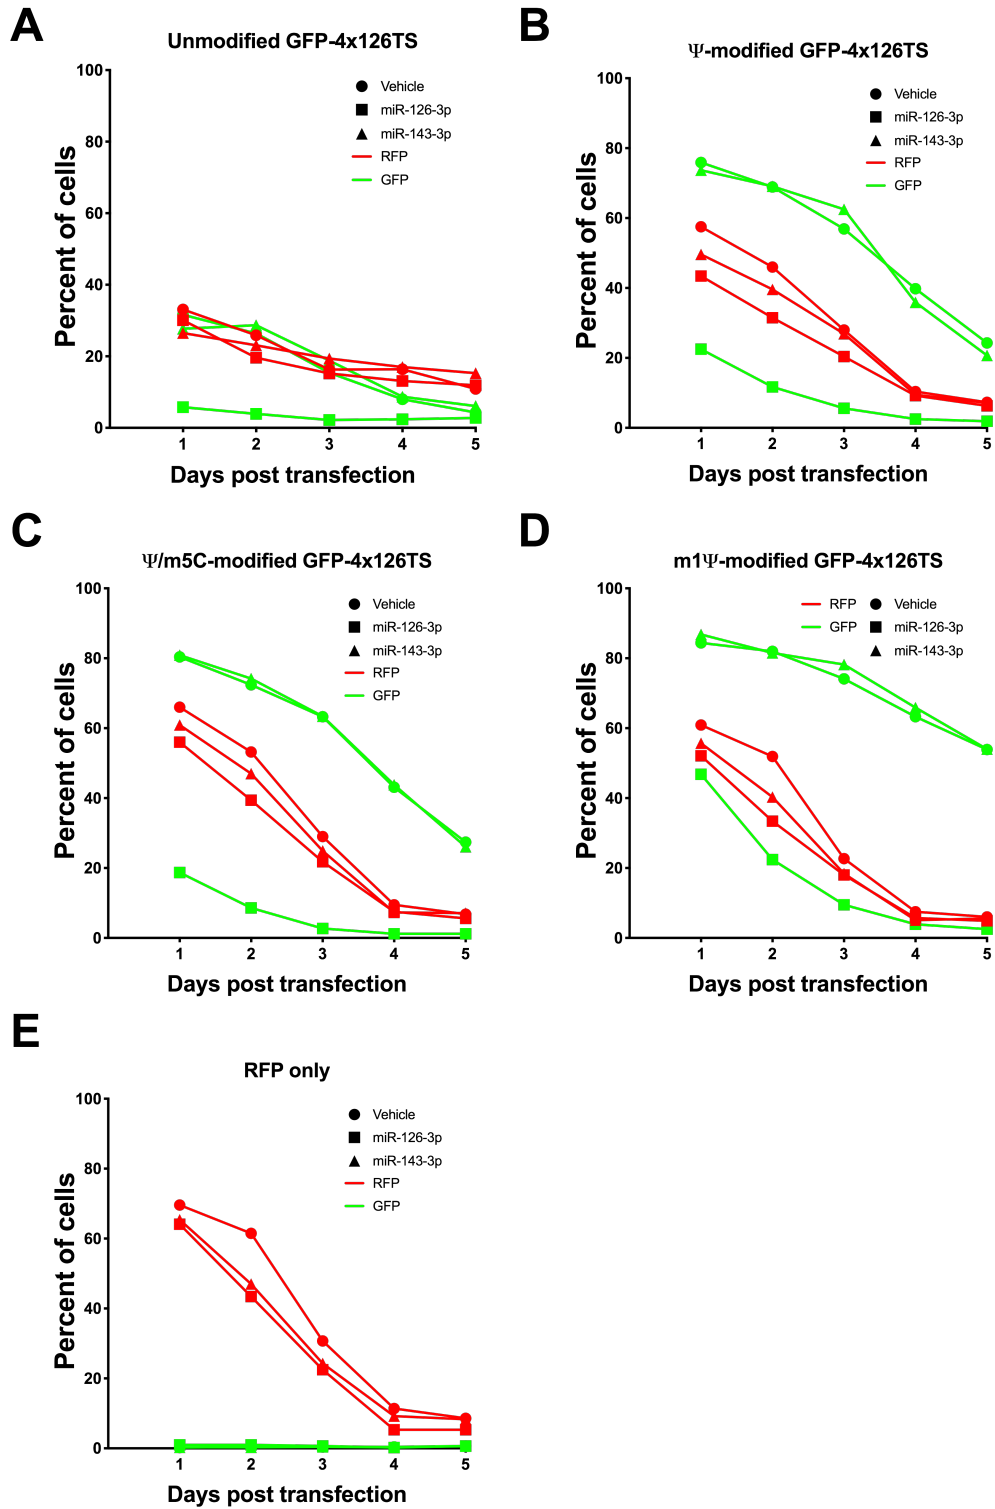

**Supplementary Figure 6: Long-term kinetics of miRNA switch silencing.** (A-E) HEK293 cells were transfected with the indicated miRNA mimic or vehicle control 24 hours prior to transfection with GFP-4x126TS miRNA switches with the indicated nucleotide modifications and control Ψ/m5C-modified RFP mRNA. GFP and RFP expression was analyzed by flow cytometry of 5000 cells every 24 hours after transfection.



**Supplementary Table S1. List of oligonucleotides used to generate plasmids and templates for *in vitro* transcription**

| <b>Construction of Plasmid Templates</b>           |                                              |         |                                                                                                                      |
|----------------------------------------------------|----------------------------------------------|---------|----------------------------------------------------------------------------------------------------------------------|
| 1                                                  | EcoRI-BamHI-PacI-SphI- <i>β</i> globin 3'UTR | Forward | 5'-ATTA-gaatc-ggatcc-ttaattaa-gcatgc-GCTCGC TTTCTTGCTGTCCAATTCTA                                                     |
| 2                                                  | EcoRI- <i>β</i> globin 3'UTR                 | Reverse | 5'-ATTA-gaatc-GCAATGAAAATAAATGTTTTT ATTAGGCAGAAATCCAGAT                                                              |
| 3                                                  | BamHI-1x126TS-BamHI                          | Forward | 5'-gatcc-CGCATTATTACTCACGGTACGA-g                                                                                    |
| 4                                                  | BamHI-1x126TS-BamHI                          | Reverse | 5'-gatcc-TCGTACCGTGAGTAATAATGCG-g                                                                                    |
| 5                                                  | BamHI-2x126TS-BamHI                          | Forward | 5'-gatcc-CGCATTATTACTCACGGTACGAGATCGATCCGCATTATTACTCACGGTACGA-g                                                      |
| 6                                                  | BamHI-2x126TS-BamHI                          | Reverse | 5'-gatcc-TCGTACCGTGAGTAATAATGCGGATCGATCTCGTACCGTGAGTAATAATGCG-g                                                      |
| 7                                                  | PacI-2x126TS-PacI                            | Forward | 5'-taa-CGCATTATTACTCACGGTACGAGATCGATCCGCATTATTACTCACGGTACGA-ttaat                                                    |
| 8                                                  | PacI-2x126TS-PacI                            | Reverse | 5'-taa-TCGTACCGTGAGTAATAATGCGGATCGATCTCGTACCGTGAGTAATAATGCG-ttaat                                                    |
| 9                                                  | BamHI-2x126seed-BamHI                        | Forward | 5'-gatcc-TTAACTAAATGTAAGGTACGAatt taTTAACTAAATGTAAGGTACGAA-g                                                         |
| 10                                                 | BamHI-2x126seed-BamHI                        | Reverse | 5'-gatcc-TTCGTACCTTACATTTAGTTAAAtaatTCGTACCTTACATTTAGTTAAA-g                                                         |
| 11                                                 | BamHI-2x21TS-BamHI                           | Forward | 5'-gatcc-TCAACATCAGTCTGATAAGCTAgatc gatcTCAACATCAGTCTGATAAGCTA-g                                                     |
| 12                                                 | BamHI-2x21TS-BamHI                           | Reverse | 5'-gatcc-TAGCTTATCAGACTGATGTTGAgatc gatcTAGCTTATCAGACTGATGTTGA-g                                                     |
| 13                                                 | PacI-2x21TS-PacI                             | Forward | 5'-taa-TCAACATCAGTCTGATAAGCTAgatc gatcTCAACATCAGTCTGATAAGCTA-ttaat                                                   |
| 14                                                 | PacI-2x21TS-PacI                             | Reverse | 5'-taa-TAGCTTATCAGACTGATGTTGAgatc gatcTAGCTTATCAGACTGATGTTGA-ttaat                                                   |
| 15                                                 | BamHI-2x145TS-BamHI                          | Forward | 5-gatcc-AGGGATTCTGGGAAAACCTGGACgatc gatcAGGGATTCTGGGAAAACCTGGAC-g                                                    |
| 16                                                 | BamHI-2x145TS-BamHI                          | Reverse | 5'-gatcc-GTCCAGTTTTCCAGGAATCCCTgatc gatcGTCCAGTTTTCCAGGAATCCCT-g                                                     |
| 17                                                 | PacI-2x145TS-PacI                            | Forward | 5'-taa-AGGGATTCTGGGAAAACCTGGACgatc gatcAGGGATTCTGGGAAAACCTGGAC-ttaat                                                 |
| 18                                                 | PacI-2x145TS-PacI                            | Reverse | 5'-taa-GTCCAGTTTTCCAGGAATCCCTgatc gatcGTCCAGTTTTCCAGGAATCCCT-ttaat                                                   |
| 19                                                 | BamHI-2x122TS-BamHI                          | Forward | 5-gatcc-CAAACACCATTGTCACACTCCAgatc gatcCAAACACCATTGTCACACTCCA-g                                                      |
| 20                                                 | BamHI-2x122TS-BamHI                          | Reverse | 5'-gatcc-TGGAGTGTGACAATGGTGTGTTGgatc gatcTGGAGTGTGACAATGGTGTGTTG-g                                                   |
| 21                                                 | PacI-2x122TS-PacI                            | Forward | 5'-taa-CAAACACCATTGTCACACTCCAgatc gatcCAAACACCATTGTCACACTCCA-ttaat                                                   |
| 22                                                 | PacI-2x122TS-PacI                            | Reverse | 5'-taa-TGGAGTGTGACAATGGTGTGTTGgatc gatcTGGAGTGTGACAATGGTGTGTTG-ttaat                                                 |
| <b>Templates for <i>in vitro</i> transcription</b> |                                              |         |                                                                                                                      |
| 23                                                 | T7- <i>β</i> globin 5' UTR-GFP               | Forward | 5'-CTTATGTCAATAATACGACTCACTATA GGG-ACATTTGCTTCTGACACAACCTGTGTTCA CTAGCAACCTCAAACAGACCACC-ATGGTGA GCAAGGGCGAGGAGCTGTT |
| 24                                                 | <i>β</i> globin 3' UTR                       | Reverse | 5'-GCAATGAAAATAAATGTTTTTATTAGGCAG AATCCAGAT                                                                          |

|    |                                            |         |                                                                                                                                                                                      |
|----|--------------------------------------------|---------|--------------------------------------------------------------------------------------------------------------------------------------------------------------------------------------|
| 25 | <b>T7-<i>β</i>globin 5'UTR-1x126TS-GFP</b> | Forward | 5'-CTTATGTCAATAATACGACTCACTATA<br><b>GGG</b> -ACATTGCTTCTGACACAACCTGTGTTCA<br>CTAGCAACCTCAAACAGACCACC-CGCATTAT<br>TACTCACGGTACGA-ctagcgctaccggtcgccacc<br>ATGGTGAGCAAGGGCGAGGAGCTGTT |
|----|--------------------------------------------|---------|--------------------------------------------------------------------------------------------------------------------------------------------------------------------------------------|

**Supplementary Table S2. Summary of miRNA switch silencing in HEK293 cells.**

|                          | <b>Unmodified</b> | <b><math>\Psi</math></b> | <b><math>\Psi/m5C</math></b> | <b>m1<math>\Psi</math></b> |
|--------------------------|-------------------|--------------------------|------------------------------|----------------------------|
| <b>GFP-1x126TS</b>       | 0.235             | 0.364                    | 0.184                        | N/A                        |
| <b>GFP-2x126TS</b>       | 0.264             | 0.35                     | 0.18                         | N/A                        |
| <b>GFP-3x126TS</b>       | 0.077             | 0.236                    | 0.135                        | N/A                        |
| <b>GFP-4x126TS</b>       | 0.068             | 0.123                    | 0.145                        | 0.318                      |
| <b>GFP-4x21TS</b>        | 0.105             | 0.415                    | 0.256                        | 0.194                      |
| <b>GFP-4x145TS</b>       | 0.11              | 0.438                    | 0.326                        | 0.329                      |
| <b>GFP-4x122TS</b>       | 0.095             | 0.116                    | 0.202                        | 0.21                       |
| <b>GFP-2x126seed</b>     | 0.206             | 0.449                    | 0.416                        | N/A                        |
| <b>5'UTR-1x126TS-GFP</b> | 0.011             | 0.09                     | 0.109                        | 0.057                      |

**Supplementary Table S2: Summary of miRNA switch silencing in HEK293 cells.** The mean relative GFP expression from the indicated miRNA switches in the presence of their cognate miRNA mimics.
